# Supplementary material for: Histo-Blood Group Antigens Act as Attachment Factors of Rabbit Hemorrhagic Disease Virus Infection in a Virus Strain-Dependent Manner
Source: PLOS journal article supplement (doi:10.1371/journal.ppat.1002188), 2011-08-25
Supplement: S5 (10.1371/journal.ppat.1002188.s005) [file journal.ppat.1002188.s005]

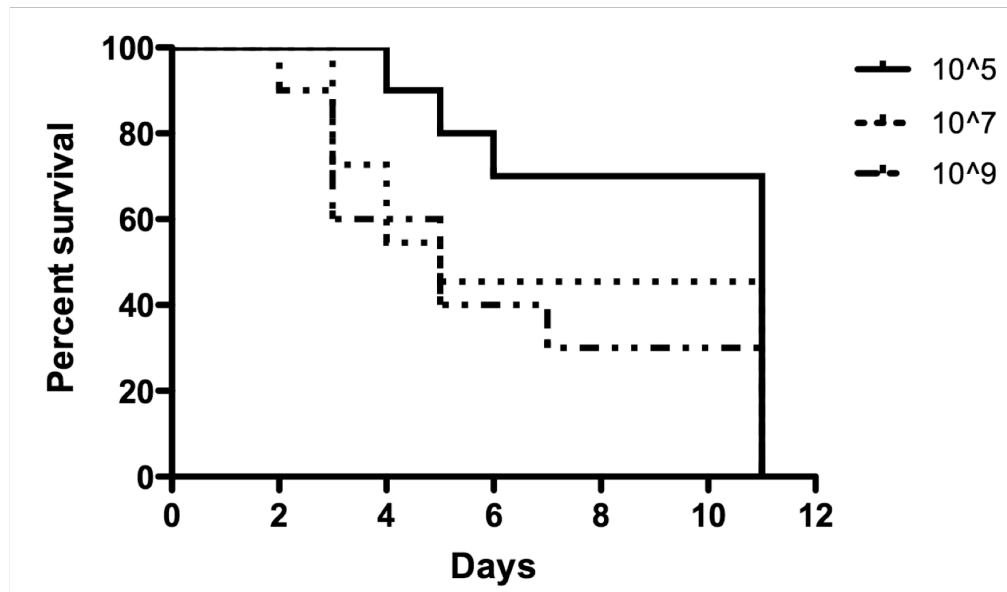

Figure S5. Survival analysis of rabbits challenged with the G4 strain at 3 genome copies doses ( $10^5$ ,  $10^7$  and  $10^9$ ). At 11 days, all survivors were sacrificed. There were no statistically significant differences between the 3 groups.
