# Supplementary material for: Histo-Blood Group Antigens Act as Attachment Factors of Rabbit Hemorrhagic Disease Virus Infection in a Virus Strain-Dependent Manner
Source: PLOS journal article supplement (doi:10.1371/journal.ppat.1002188), 2011-08-25
Supplement: S8 (10.1371/journal.ppat.1002188.s008) [file journal.ppat.1002188.s008]

Table S3. Summary of all structures observed in the MALDI-TOF-MS spectra of the duodenum tissue from rabbits, Samples 1-10. The symbol presentation of O-glycans is based on the nomenclature used in Essentials of Glycobiology textbook (<http://www.ncbi.nlm.nih.gov/books/NBK1908>) and adopted by the Consortium for Functional Glycomics (<http://www.functionalglycomics.org>). Mass values  $[M + Na]^+$ , cartoon representation of structure and epitope types are reported for each peak detected. Intensity of the peaks observed is reported for each sample analyzed:

| Mass | Structure | Epitope          | Sample |     |    |    |    |     |    |    |    |    |
|------|-----------|------------------|--------|-----|----|----|----|-----|----|----|----|----|
|      |           |                  | 1      | 2   | 3  | 4  | 5  | 6   | 7  | 8  | 9  | 10 |
| 708  |           | H                | ND     | ++  | +  | ++ | ND | +   | -  | ND | ND | ++ |
| 912  |           | B                | +++    | ND  | ND | +  | +  | +   | ND | +  | +  | ND |
| 954  |           | A                | +++    | ND  | ND | -  | -  | ++  | +  | -  | -  | -- |
|      |           | H or Lewis X     | ND     | +++ | +  | +  | ++ | -   | -  | +  | +  | +  |
|      |           | H                | ND     | -   | -  | ND | -- | ND  | ND | -- | ND | -  |
| 1128 |           | Lewis Y          | ND     | +   | +  | ND | +  | +   | ND | ND | ND | +  |
| 1158 |           | H or Lewis X     | ND     | ND  | ND | ND | ND | +   | ND | ND | ND | -  |
|      |           | H                | ND     | ND  | ND | ND | ND | -   | ND | ND | ND | +  |
| 1199 |           | H or Lewis X     | ND     | +   | ND | -- | -- | ND  | ND | ND | ND | ND |
|      |           | A                | ND     | ND  | ND | ++ | ++ | +++ | +  | ND | +  | ND |
|      |           | A                | ND     | ND  | ND | -  | -  | -   | ND | ND | ND | ND |
| 1332 |           | H                | ND     | +   | ND | ND | ND | +   | ND | ND | ND | ++ |
| 1362 |           | B                | +      | ND  | ND | ND | ND | ND  | ND | ND | ND | ND |
| 1373 |           | A                | ND     | ND  | ND | +  | +  | +   | ND | ND | ND | ND |
| 1403 |           | A                | ++     | +   | -  | ND | ND | ++  | ND | ND | ND | ND |
|      |           | H                | -      | -   | ND | ND | ND | ND  | ND | ND | ND | ND |
|      |           | H or Lewis X     | ND     | ND  | +  | ND | ND | -   | ND | ND | ND | ND |
|      |           | H or Lewis X     | --     | --  | -- | ND | ND | ND  | ND | ND | ND | ND |
| 1444 |           | A                | ND     | ND  | ND | ND | ND | +   | ND | ND | ND | ND |
| 1577 |           | A and Lewis X/H  | ND     | -   | +  | ND | ND | +   | ND | ND | ND | ND |
|      |           | H and/or Lewis X | ND     | +   | ND | ND | ND | ND  | ND | ND | ND | ND |
|      |           | A and H          | ND     | +   | ND | ND | ND | ND  | ND | ND | ND | ND |
| 1648 |           | A                | ND     | ND  | ND | ND | ND | +   | ND | ND | ND | ND |
| 1822 |           | A and Lewis X/H  | ND     | ND  | ND | ND | ND | +   | ND | ND | ND | ND |

ND = not detected

-- = very minor component (<25%)

- = minor component (25-50%)

+ = major component (> 25%)

++ = very major component (25-50%)

+++ = most abundant component (>50%)
